# Supplementary material
Source: publisher site journal article supplement (https://www.dovepress.com/article/412599)
Supplement: Supplementary file 1 [file get_supplementary_file.php]

| **CODE** | **SEX** | **AGE** | **NATIONALITY** | **CITY** | **ETHNIC GROUP** | **HEALTH CENTER** | **GENOTYPE** | **VIRAL LOAD** | **AST** | **ALT** | **GGT** | **ALP** | **TOTAL BILIRUBIN** | **DIRECT BILIRUBIN** | **INDIRECT BILIRUBIN** |
| --- | --- | --- | --- | --- | --- | --- | --- | --- | --- | --- | --- | --- | --- | --- | --- |
| **OC0917** | **M** | **41** | **ECU** | **SIMON BOLIVAR/ GUAYAS** | **MESTIZO** | **HOSPITAL GUAYAQUIL** | **2B** |  |  |  |  |  |  |  |  |
| **RG0912** | **F** | **51** | **ECU** | **GUAYAQUIL/ GUAYAS** | **MESTIZO** | **CS SIMON BOLIVAR** | **2B** | **50.866** | **36** | **27** | **16,3** | **158** | **0,31** | **0,18** | **0,13** |
| **CM0909** | **F** | **58** | **ECU** | **QUITO/ PICHINCHA** | **MESTIZO** | **EUGENIO ESPEJO** | **NO AMPLIFICATION** | **135.967** | **179** | **275** | **29** | **100** | **0,76** | **0,31** | **0,45** |
| **JM1704** | **M** | **65** | **ECU** | **QUITO/ PICHINCHA** | **MESTIZO** | **EUGENIO ESPEJO** | **NO AMPLIFICATION** | **1.315.320** | **162** | **145** | **28** | **81** | **1,46** | **0,94** | **0,52** |
| **EPH431** | **F** | **75** | **CU** | **QUITO/ PICHINCHA** | **MESTIZO** | **EUGENIO ESPEJO** | **1A** | **2.211.600** | **41** | **53** | **25** | **71** | **0,56** | **0,21** | **0,35** |
| **JE1707** | **M** | **57** | **ECU** | **QUITO/ PICHINCHA** | **MESTIZO** | **EUGENIO ESPEJO** | **NO AMPLIFICATION** | **11,814** | **32** | **46** | **27,6** | **85** | **0,63** | **0,28** | **0,35** |
| **BP1759** | **M** | **29** | **VNZ** | **QUITO/ PICHINCHA** | **MESTIZO** | **EUGENIO ESPEJO** | **2B** | **44.000** | **26** | **22** | **16** | **60** | **0,42** | **0,18** | **0,26** |
| **MR1002** | **F** | **65** | **ECU** | **QUITO/ PICHINCHA** | **MESTIZO** | **EUGENIO ESPEJO** | **4D** |  |  |  |  |  |  |  |  |
| **LU1758** | **F** | **48** | **ECU** | **QUITO/ PICHINCHA** | **MESTIZO** | **EUGENIO ESPEJO** | **1B** | **4.818** | **67** | **96** | **61,1** | **66** | **0,82** | **0,28** | **0,54** |
| **LG1722** | **F** | **29** | **ECU** | **QUITO/ PICHINCHA** | **MESTIZO** | **EUGENIO ESPEJO** | **2B** |  |  |  |  |  |  |  |  |
| **MZ0915** | **F** | **48** | **ECU** | **GUAYAQUIL/ GUAYAS** | **MESTIZO** | **HOSPITAL DE INFECTOLOGIA** | **2B** |  |  |  |  |  |  |  |  |
| **GATE1706** | **M** | **61** | **ECU** | **QUITO/ PICHINCHA** | **MESTIZO** | **CARLOS ANDRADE MARIN** | **NO AMPLIFICATION** |  |  |  |  |  |  |  |  |
| **LERE1314** | **M** | **29** | **ECU** | **GUAYAQUIL/ GUAYAS** | **MESTIZO** | **HOSPITAL GUAYAQUIL** | **4D** |  |  |  |  |  |  |  |  |
| **ROFA0912** | **F** | **54** | **ECU** | **GUAYAQUIL/ GUAYAS** | **MESTIZO** | **HOSPITAL GUAYAQUIL** | **2B** |  |  |  |  |  |  |  |  |
| **DEZA1316** | **F** | **26** | **ECU** | **GUAYAQUIL/ GUAYAS** | **MESTIZO** | **HOSPITAL GUAYAQUIL** | **2B** |  |  |  |  |  |  |  |  |

**Supplementary Table 1:** Information obtain from the 1A form and data provided by the MSP


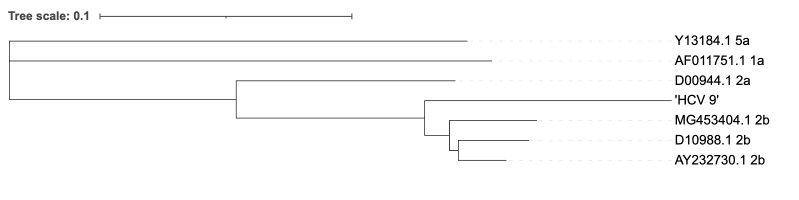


**Supplementary Figure 1:** Phylogenetic tree based on fragments F2-R2 forward and reverse, determination of genotypes and subgenotypes.


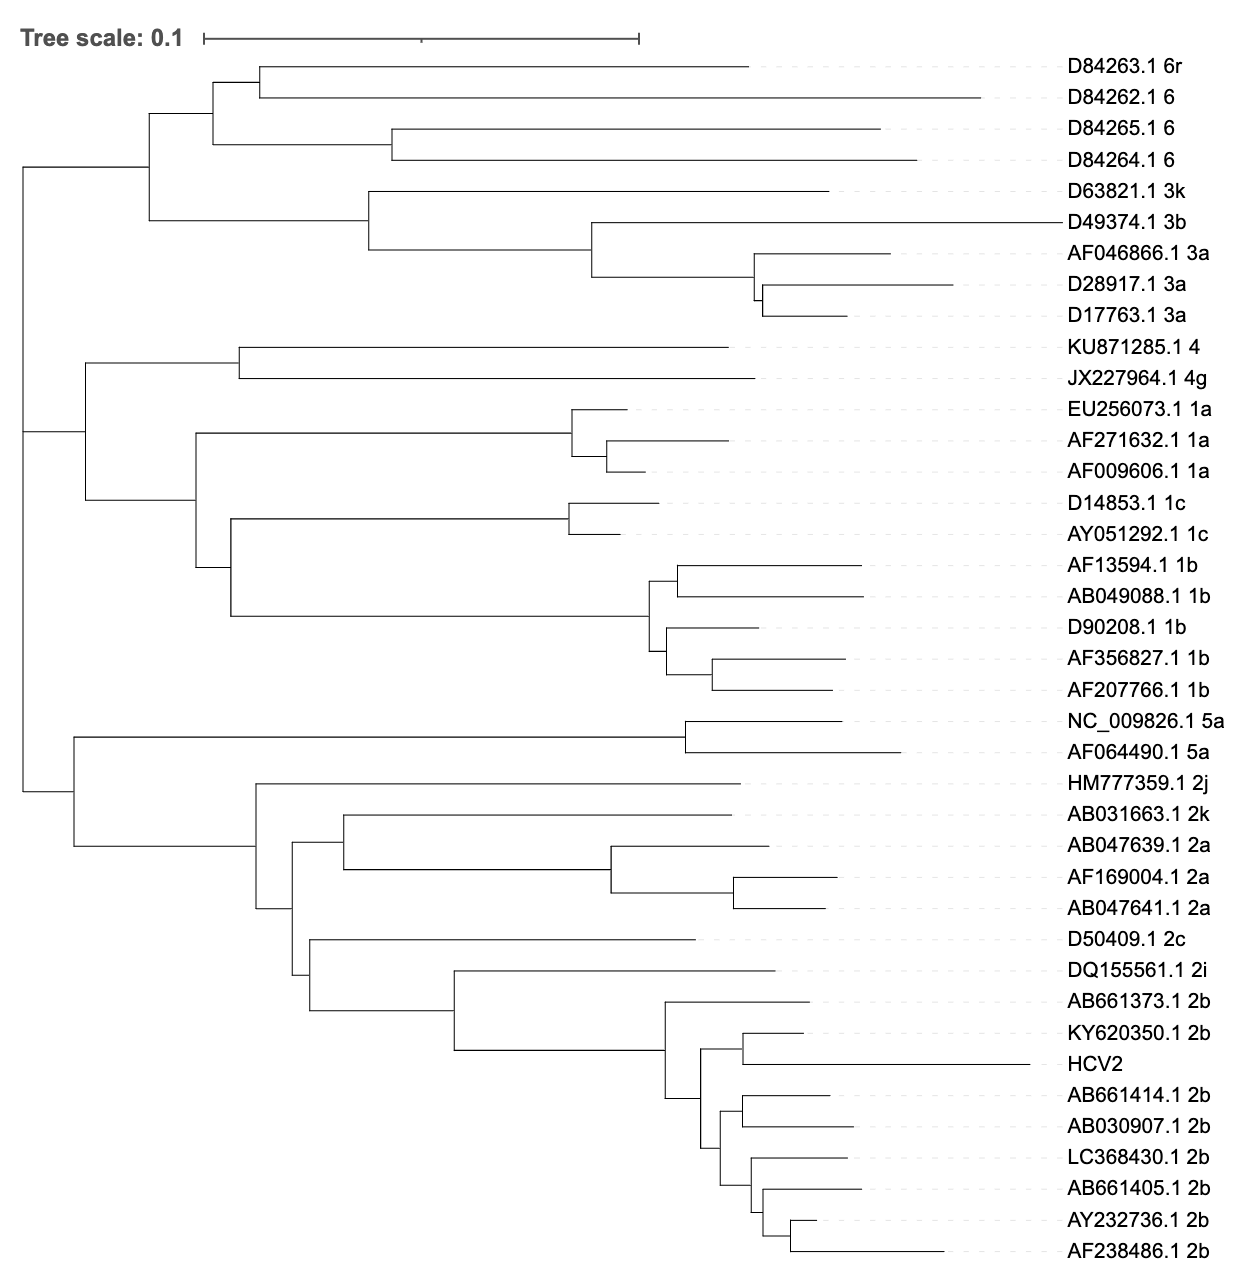


**Supplementary Figure 2:** Phylogenetic tree based on fragments F1-R1 (forward strand), determination of genotypes and subgenotypes.


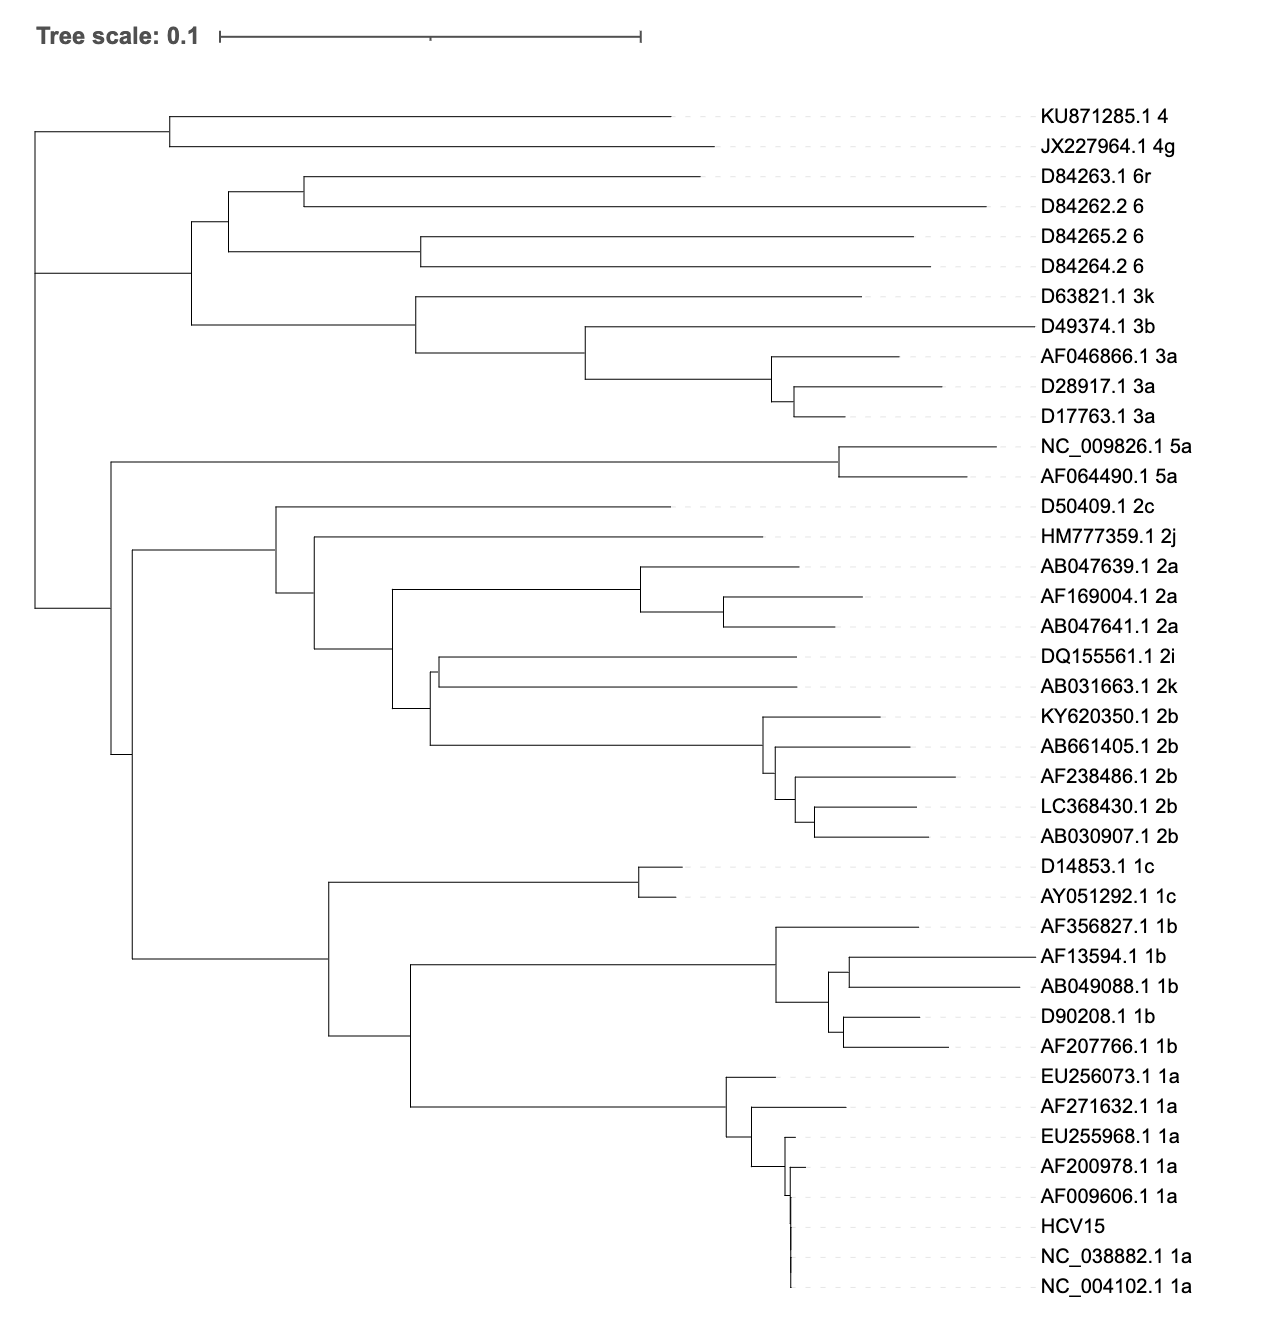


**Supplementary Figure 3:** Phylogenetic tree based on fragments F1-R1 (reverse strand), determination of genotypes and subgenotypes.
